# Supplementary material for: Optimization of Thymidine Kinase-Based Safety Switch for Neural Cell Therapy
Source: MDPI journal article supplement (doi:10.3390/cells11030502), 2022-01-31
Supplement: s1 [file s1]

Supplementary data:

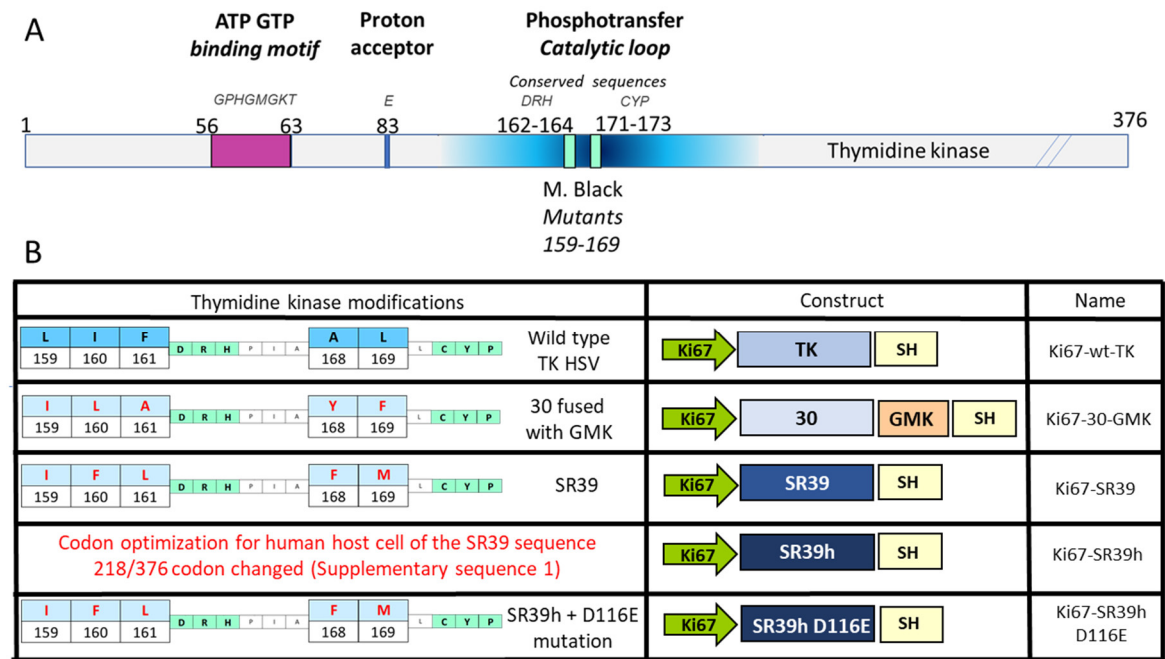

Supplementary Figure S1: Herpes simplex thymidine kinase (TK) variants used in this study.

A) Schematic representation of wild type TK; the two variants generated by Margaret Black (variant 30 and variant SR39) have amino changes close to the highly conserved region (162-164 and 171-173). B) Schematic representation of the different variants. Wild type TK is shown in the top lane, the two Margaret Black variants in lane 2 and 3, and two novel variants created for this study (SR39h and SR39h D116E) are shown in lane 4 and 5. Note that variant 30 was a fusion protein of a TK variant and guanylate kinase (GMK). The humanized SR39h variant codes for the same amino acid sequence as SR39. All variants had an N-terminal “she ble” protein (SH) extension conferring zeocin resistance to cell lines expressing the construct. For most experiments shown in our study, TK variants were expressed under the control of the Ki67 cell-cycle-dependent promoter.

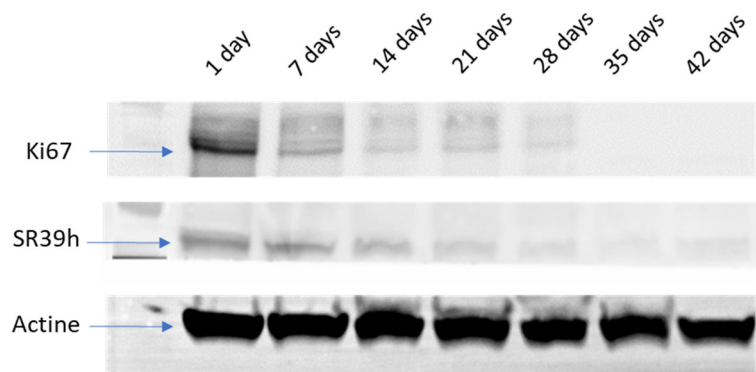

Supplementary Figure S2: Decreased of SR39h and Ki67 protein level during cell differentiation toward neurons. hESC expressing SR39h under the control of the Ki67 promoter were differentiated toward neurons during 42 days. Protein expression of SR39h and the endogenous Ki67 was analyzed by Western blot. The lower panel is a loading control with an anti-actin antibody.

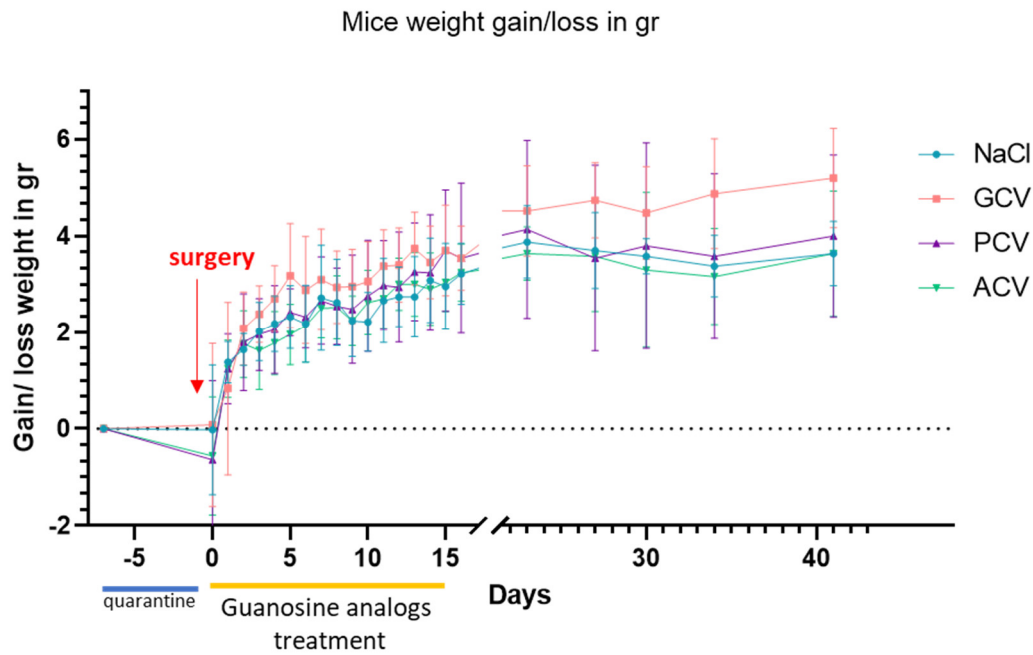

### Supplementary Figure S3: Mice weight

Mice were weighed daily during guanosine analogs treatment to identify differences in weight gain/loss between treated groups. No differences were observed between treatment groups.

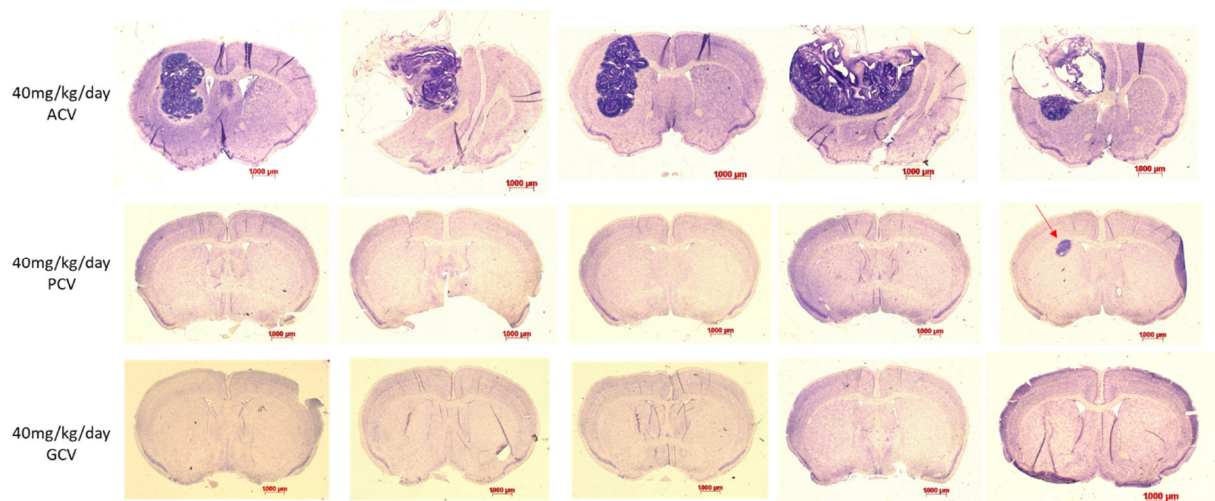

**Supplementary Figure S4: *in vivo* validation of suicide gene.** Coronal section of NOD/SCID mice 47 days after injection of hESC expressing the SR39h thymidine kinase variant. Mice were treated for 2x5 days with the respective nucleoside analogs (see Methods). Upper lane: ACV; middle lane: PCV; lower lane: GCV. Sections were colored with cresyl violet and dark purple staining reflects a high density of nuclei. Scale bar 1000  $\mu$ m.

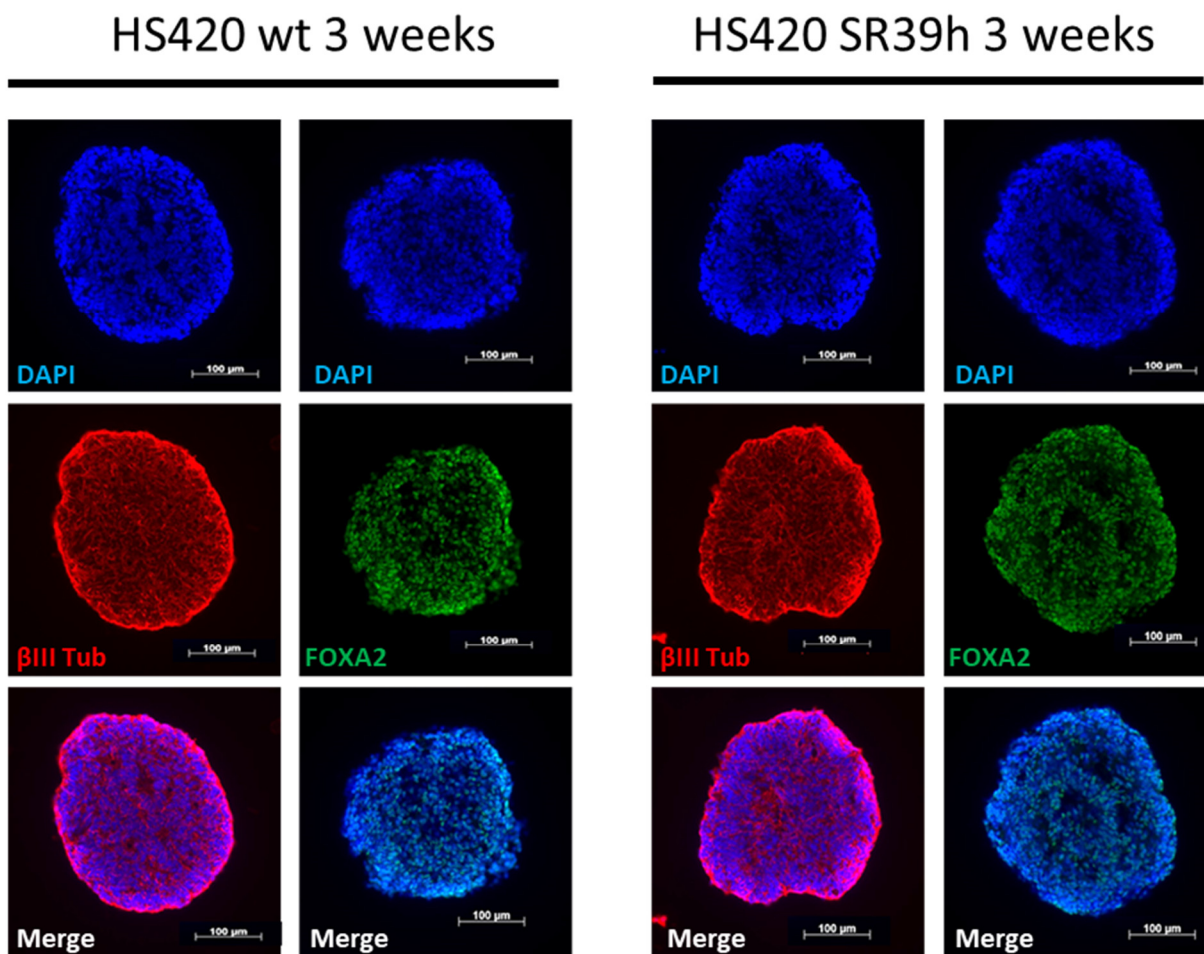

**Supplementary Figure S5: *hESC* differentiation toward neurons.**

Wild type and SR39h expressing hESC were differentiated towards neurons during 3 weeks. Immunostaining: FOXA2 (mouse, Santa Cruz, sc-374376), beta-III tubulin (βIII Tub, mouse, Sigma, T8660), nuclei were counterstained with DAPI.

**Supplementary sequence 1: SR39h and SR39 sequence alignment.** Viral-TK DNA sequence was humanized using web-based algorithms ([www.genscript.com](http://www.genscript.com)), nucleotides changed in SR39h sequence were labeled in red.

```
>>SR39 1131 bp (1131 nt)
Waterman-Eggert score: 3359; 221.0 bits; E(1) < 3.7e-61
77.5% identity (77.5% similar) in 1129 nt overlap (1-1129:1-1129)
```

|       |                |                |                |                 |       |       |
|-------|----------------|----------------|----------------|-----------------|-------|-------|
|       | 10             | 20             | 30             | 40              | 50    | 60    |
| SR39h | ATGGCCTCTTATCC | TGGACACAGCACGC | CAGCGCCTTGATC  | CAGGCTGCCAGATCT | AGAG  |       |
|       | .....          | .....          | .....          | .....           | ..... | ..... |
| SR39  | ATGGCTTCGTACCC | CGGCCATCAACACG | CGTCTGCGTTCGAC | CAGGCTGCGCGTT   | CTCGC |       |
|       | 10             | 20             | 30             | 40              | 50    | 60    |

  

|       |                |               |               |               |         |       |
|-------|----------------|---------------|---------------|---------------|---------|-------|
|       | 70             | 80            | 90            | 100           | 110     | 120   |
| SR39h | GGCCACAGCAACAG | AGAGAACAGCCCT | GCCTCGGAGACAG | CAAGAGGCTACAG | AAGTT   |       |
|       | .....          | .....         | .....         | .....         | .....   | ..... |
| SR39  | GGCCATAGCAACCG | ACGTACGGCGTTG | CGCCCTCGCCGGC | AGCAAGAGCCACG | GGAAGTC |       |
|       | 70             | 80            | 90            | 100           | 110     | 120   |

|       |        |           |         |         |          |           |
|-------|--------|-----------|---------|---------|----------|-----------|
|       | 130    | 140       | 150     | 160     | 170      | 180       |
| SR39h | CGGCCC | GAGCAGAA  | GATGCC  | CACACT  | GCTGAG   | AGTGTACAT |
| SR39  | CGCCCG | GAGCAGAAA | ATGCCAC | GCTACT  | GCGGGTTT | TATATAGAC |
|       | 130    | 140       | 150     | 160     | 170      | 180       |
|       | 190    | 200       | 210     | 220     | 230      | 240       |
| SR39h | GGCAA  | GACCAC    | AACAACA | GCTGCT  | GGTGGCC  | CTGGGCAG  |
| SR39  | GGGAAA | ACCACC    | ACGCAAC | TGCTGGT | TGGCCCT  | TGGGTT    |
|       | 190    | 200       | 210     | 220     | 230      | 240       |
|       | 250    | 260       | 270     | 280     | 290      | 300       |
| SR39h | GTGCCC | GAGCCT    | TATGAC  | CTATT   | TGGAG    | AGTGTG    |
| SR39  | GTACCC | GAGCCG    | ATGACT  | TACTGG  | CGGGT    | GCTGGG    |
|       | 250    | 260       | 270     | 280     | 290      | 300       |
|       | 310    | 320       | 330     | 340     | 350      | 360       |
| SR39h | TACACC | CACACA    | GCACCG  | GCTGGAT | CAGGGC   | GAATTT    |
| SR39  | TACACC | CACACA    | ACACCG  | CCTCGAC | CAGGGT   | GAGATAT   |
|       | 310    | 320       | 330     | 340     | 350      | 360       |
|       | 370    | 380       | 390     | 400     | 410      | 420       |
| SR39h | ATGACA | TCTG      | CCAGAT  | CACCAT  | TGGGCAT  | GCCTTAC   |
| SR39  | ATGACA | AAGCGC    | CCAGATA | AACAAT  | TGGGCAT  | GCCTTAT   |
|       | 370    | 380       | 390     | 400     | 410      | 420       |
|       | 430    | 440       | 450     | 460     | 470      | 480       |
| SR39h | CCTCA  | CATTGG    | CGGAGA  | AGCGG   | ATCTT    | CTCATG    |
| SR39  | CCTCA  | TATCGG    | GGGGG   | GAGGCT  | GGGAGC   | TACATG    |
|       | 430    | 440       | 450     | 460     | 470      | 480       |
|       | 490    | 500       | 510     | 520     | 530      | 540       |
| SR39h | CTGGAC | AGACAC    | CCCTAT  | ATCGC   | CTTCAT   | GCTGTGT   |
| SR39  | CTCGAC | CGCCAT    | CCCATC  | GCCTT   | CATGCT   | GTGCTAC   |
|       | 490    | 500       | 510     | 520     | 530      | 540       |
|       | 550    | 560       | 570     | 580     | 590      | 600       |
| SR39h | AGCATG | ACCTC     | AGGCCG  | TGCTGG  | CTTTTC   | GTGGCC    |
| SR39  | AGCATG | ACCCCC    | AGGCCG  | TGCTGG  | CGTTTC   | GTGGCC    |
|       | 550    | 560       | 570     | 580     | 590      | 600       |
|       | 610    | 620       | 630     | 640     | 650      | 660       |
| SR39h | ACCAAT | TATCGT    | GTGGG   | AGCCCT  | GCCTG    | AGGACC    |
| SR39  | ACCAAC | ATCGTG    | CTTGGG  | GGCCCT  | TCCGGAG  | GACAGAC   |
|       | 610    | 620       | 630     | 640     | 650      | 660       |
|       | 670    | 680       | 690     | 700     | 710      | 720       |
| SR39h | CAGCG  | GCCTGG    | CGAGAG  | ACTGG   | ATCTGG   | CTATGCT   |

[illegible]
